# Supplementary material
Source: HighWire-hosted journal article supplement (https://erj.ersjournals.com/content/59/1/2004590)

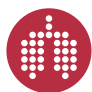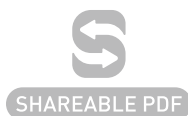

# Blood eosinophil counts in the general population and airways disease: a comprehensive review and meta-analysis

Victoria S. Benson<sup>1</sup>, Sylvia Hartl <sup>2</sup>, Neil Barnes<sup>3,4</sup>, Nicholas Galwey<sup>5</sup>, Melissa K. Van Dyke <sup>6</sup> and Namhee Kwon<sup>7</sup>

<sup>1</sup>Epidemiology, Value Evidence and Outcomes (VEO), Global Medical R&D, GlaxoSmithKline, Brentford, UK. <sup>2</sup>Dept of Respiratory and Critical Care Medicine and Ludwig Boltzmann Institute for Lung Health, Clinic Penzing, WiGev and Sigmund Freud University, Medical School, Vienna, Austria. <sup>3</sup>Respiratory Therapy Area, GlaxoSmithKline, Brentford, UK. <sup>4</sup>William Harvey Institute, Barts and The London School of Medicine and Dentistry, London, UK. <sup>5</sup>Research Statistics, GlaxoSmithKline, Stevenage, UK. <sup>6</sup>Epidemiology, Value Evidence and Outcomes (VEO), Global Medical R&D, GlaxoSmithKline, Upper Providence, PA, USA. <sup>7</sup>Respiratory Research and Development, GlaxoSmithKline, Brentford, UK.

Corresponding author: Victoria S. Benson ([victoria.x.tribble@gsk.com](mailto:victoria.x.tribble@gsk.com))

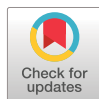

Shareable abstract (@ERSpublications)

**Blood eosinophil (EOS) counts are of interest as asthma/COPD treatment–response biomarkers. This comprehensive review describes EOS distributions/ranges published in asthma/COPD, controls and the general population.** <https://bit.ly/3ph1G9M>

**Cite this article as:** Benson VS, Hartl S, Barnes N, *et al.* Blood eosinophil counts in the general population and airways disease: a comprehensive review and meta-analysis. *Eur Respir J* 2022; 59: 2004590 [DOI: 10.1183/13993003.04590-2020].

This single-page version can be shared freely online.

Copyright ©The authors 2022.

This version is distributed under the terms of the Creative Commons Attribution Non-Commercial Licence 4.0. For commercial reproduction rights and permissions contact [permissions@ersnet.org](mailto:permissions@ersnet.org)

This article has supplementary material available from [erj.ersjournals.com](http://erj.ersjournals.com)

This article has an editorial commentary: <https://doi.org/10.1183/13993003.02180-2021>

Received: 21 Dec 2020  
Accepted: 26 May 2021

## Abstract

**Background** The clinical context for using blood eosinophil (EOS) counts as treatment–response biomarkers in asthma and COPD requires better understanding of EOS distributions and ranges. We describe EOS distributions and ranges published in asthma, COPD, control (non-asthma/COPD) and general populations.

**Methods** We conducted a comprehensive literature review and meta-analysis of observational studies (January 2008 to November 2018) that included EOS counts in asthma, severe asthma, COPD, control and general populations. Excluded studies had total sample sizes <200, EOS as inclusion criterion, hospitalised population only and exclusively paediatric participants.

**Results** Overall, 91 eligible studies were identified, most had total-population-level data available: asthma (39 studies), severe asthma (12 studies), COPD (23 studies), control (seven studies) and general populations (14 studies); some articles reported data for multiple populations. Reported EOS distributions were right-skewed (seven studies). Reported median EOS counts ranged from 157–280 cells· $\mu\text{L}^{-1}$  (asthma, 22 studies); 200–400 cells· $\mu\text{L}^{-1}$  (severe asthma, eight studies); 150–183 cells· $\mu\text{L}^{-1}$  (COPD, six studies); and 100–160 cells· $\mu\text{L}^{-1}$  (controls, three studies); and 100–200 cells· $\mu\text{L}^{-1}$  (general populations, six studies). The meta-analysis showed that observed variability was mostly between studies rather than within studies. Factors reportedly associated with higher blood EOS counts included current smoking, positive skin-prick test, elevated total IgE, comorbid allergic rhinitis, age  $\leq 18$  years, male sex, spirometric asthma/COPD diagnosis, metabolic syndrome and adiposity.

**Conclusion** EOS distribution and range varied by study population, and were affected by clinical factors including age, smoking history and comorbidities, which, regardless of severity, should be considered during treatment decision-making.

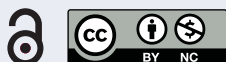

Supplement: inline-supplementary-material-2 [file inline-supplementary-material-2.pdf]
